# Supplementary material for: Green Synthesis of ZnO Nanoparticles Using Retama raetam Leaf Extract for VOC Sensing Applications
Source: MDPI journal article supplement (doi:10.3390/chemosensors14020042), 2026-02-04
Supplement: s1 [file chemosensors-4082374-supplementary.pdf › chemosensors-4082374-supplementary.pdf]

Table S1: Comparative summary of ZnO properties

| Plant Source                      | Morphology                         | Size (Average / Range) | Applications                                | Refs      |
|-----------------------------------|------------------------------------|------------------------|---------------------------------------------|-----------|
| <i>Elaeagnus angustifolia</i>     | Spherical                          | 26 nm                  | Vitro biological                            | 18        |
| <i>Pistia stratiotes</i>          | Spherical, flower-like, sheet-like | 37 nm                  | Anticancer and antibacterial                | 19        |
| <i>Acacia caesia</i>              | Spherical                          | 32 nm                  | Photocatalytic and Antimicrobial Activities | 20        |
| <i>Allium Sativum</i>             | Spheroidal                         | 30–40 nm               | photocatalytic activity                     | 21        |
| <i>Moringa oleifera</i>           | Spherical                          | 9-18 nm                | Photocatalytic activity                     | 22        |
| <i>Cayratia pedata</i>            | agglomerated form                  | 52.24 nm               | Enzyme immobilization                       | 23        |
| <i>Melia azedarach</i>            | Spherical                          | 47.5 nm                | Antibacterial activity                      | 24        |
| <i>Hylocereus undatus cladode</i> | flake-like morphology              | 50–100 nm              | Dielectric applications                     | 25        |
| <i>Ocimum tenuiflorum</i>         | Spherical                          | 19 nm                  | Metal ions adsorption                       | 26        |
| <i>Retama raetam</i>              | Spherical / Hexagonal              | 24-27 nm               | VOC Sensing                                 | This work |
